# Supplementary material
Source: ML conference proceedings conference paper supplement (https://openaccess.thecvf.com/content/ICCV2021/html/Chung_HAA500_Human-Centric_Atomic_ICCV_2021_paper.html)
Supplement: Supplementary file 1 [file Chung_HAA500_Human-Centric_Atomic_ICCV_2021_supplemental.pdf]

# HAA500: Supplementary Material

Jihoon Chung<sup>1,2</sup> Cheng-hsin Wu<sup>1,3</sup> Hsuan-ru Yang<sup>1</sup> Yu-Wing Tai<sup>1,4</sup> Chi-Keung Tang<sup>1</sup>

<sup>1</sup>HKUST <sup>2</sup>Princeton University <sup>3</sup>Carnegie Mellon University <sup>4</sup>Kuaishou Technology

jc5933@princeton.edu cwu@andrew.cmu.edu hyangap@ust.hk yuwing@gmail.com cktang@cs.ust.hk

## 1. Video Collection Procedure

To guarantee a clean dataset with no label noises, we adopt a strict video collecting methodology for every class. We detail the method below.

1. We assign a single annotator for a single class. This is to assure that the same rule applies to every video in a class.
2. The action class is classified as either continuous action or discrete action. Discrete action is when the action can have a single distinguishable action sequence. (e.g., *Baseball-Swing*, *Yoga-Bridge*, etc.). Continuous action otherwise. (*Running*, *Playing Violin*, etc.)
  - (a) If it is discrete, make an internal rule to define the action. (e.g., *Jumping Jack* starts and ends when the person is standing still. The video clip contains only a single jump. *Push-up* starts and ends when the person is at the highest point. It should only have a single push-up). Every video should follow the internal rule so that every action in the class has compatible motion.
  - (b) For continuous, we take video clips with appropriate length.
3. Here are rules that the annotator has to follow.
  - 20 videos should be unique to each other with a varied person, varied backgrounds.
  - The person in action should be the dominant person of the frame. If there are people of non-interest, they should not be performing any action.
  - Camera cuts should not exist.
  - Every video should include a large portion of the human body.
  - It is fine to have action variance that doesn't influence the semantics of the action. (e.g., a person can sit or stand in *Whistling with One Hand* as long as the motion of whistling exists.)

- 20 videos are split into train/val/test set by 16/1/3. The validation set contains the “standard” body action of the class, and 3 videos in the test set should be well diverse.

4. Two or more reviewers that are not the annotator review the video to check for any mistakes.

## 2. Experiment Detail

In this section, we explain some of the experiment details of our paper.

**Variable Length of a Video** For model [1, 2, 3, 5], we randomly select 32 adjacent frames of a video during training. If the video is shorter than 32 frames, we replicate the last frame to match the size. During testing, we replicate the last frame to match the size to a multiple of 32, where the video is then divided into smaller mini-clips of size 32. The prediction score of each mini-clip is averaged to get the final prediction. In Table 11, where we train with fewer frames, we zero-pad on both ends to size 16. On ST-GCN [4] we follow the same procedure of the original paper, where the video is either truncated or replicated to match the length of 300.

**Implementation** In all of our experiments, we use PyTorch for our deep learning framework. We use the official code of the model when they are available. While we use the same hyperparameters which the authors used for their model, for a fair comparison we do not pre-train the model before training.

## 3. List of Classes in HAA500

Here, we list classes of HAA500 in each area.

### Sports/Athletics

1. Abseiling
2. Archery
3. Backflip
4. Backward Roll

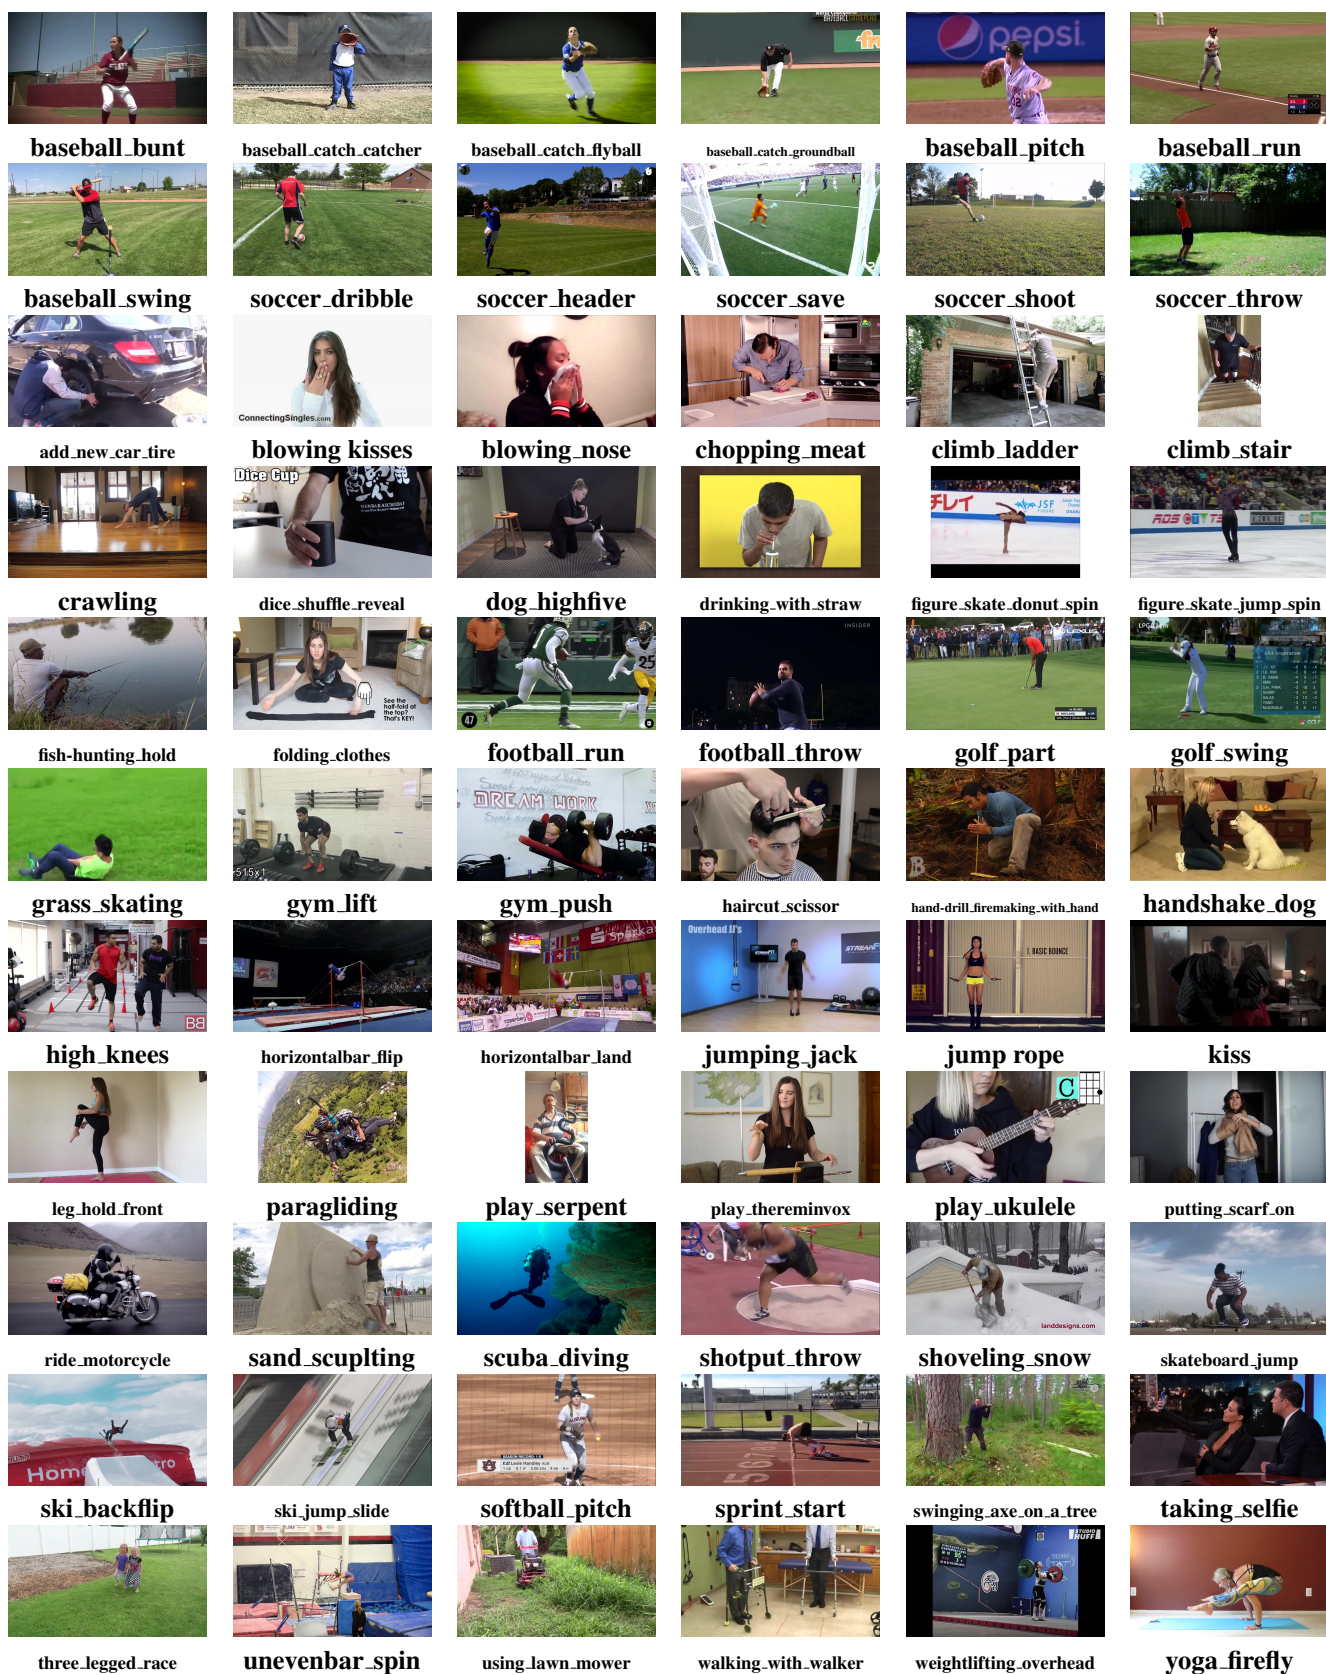

Figure 1. Video samples of different classes.



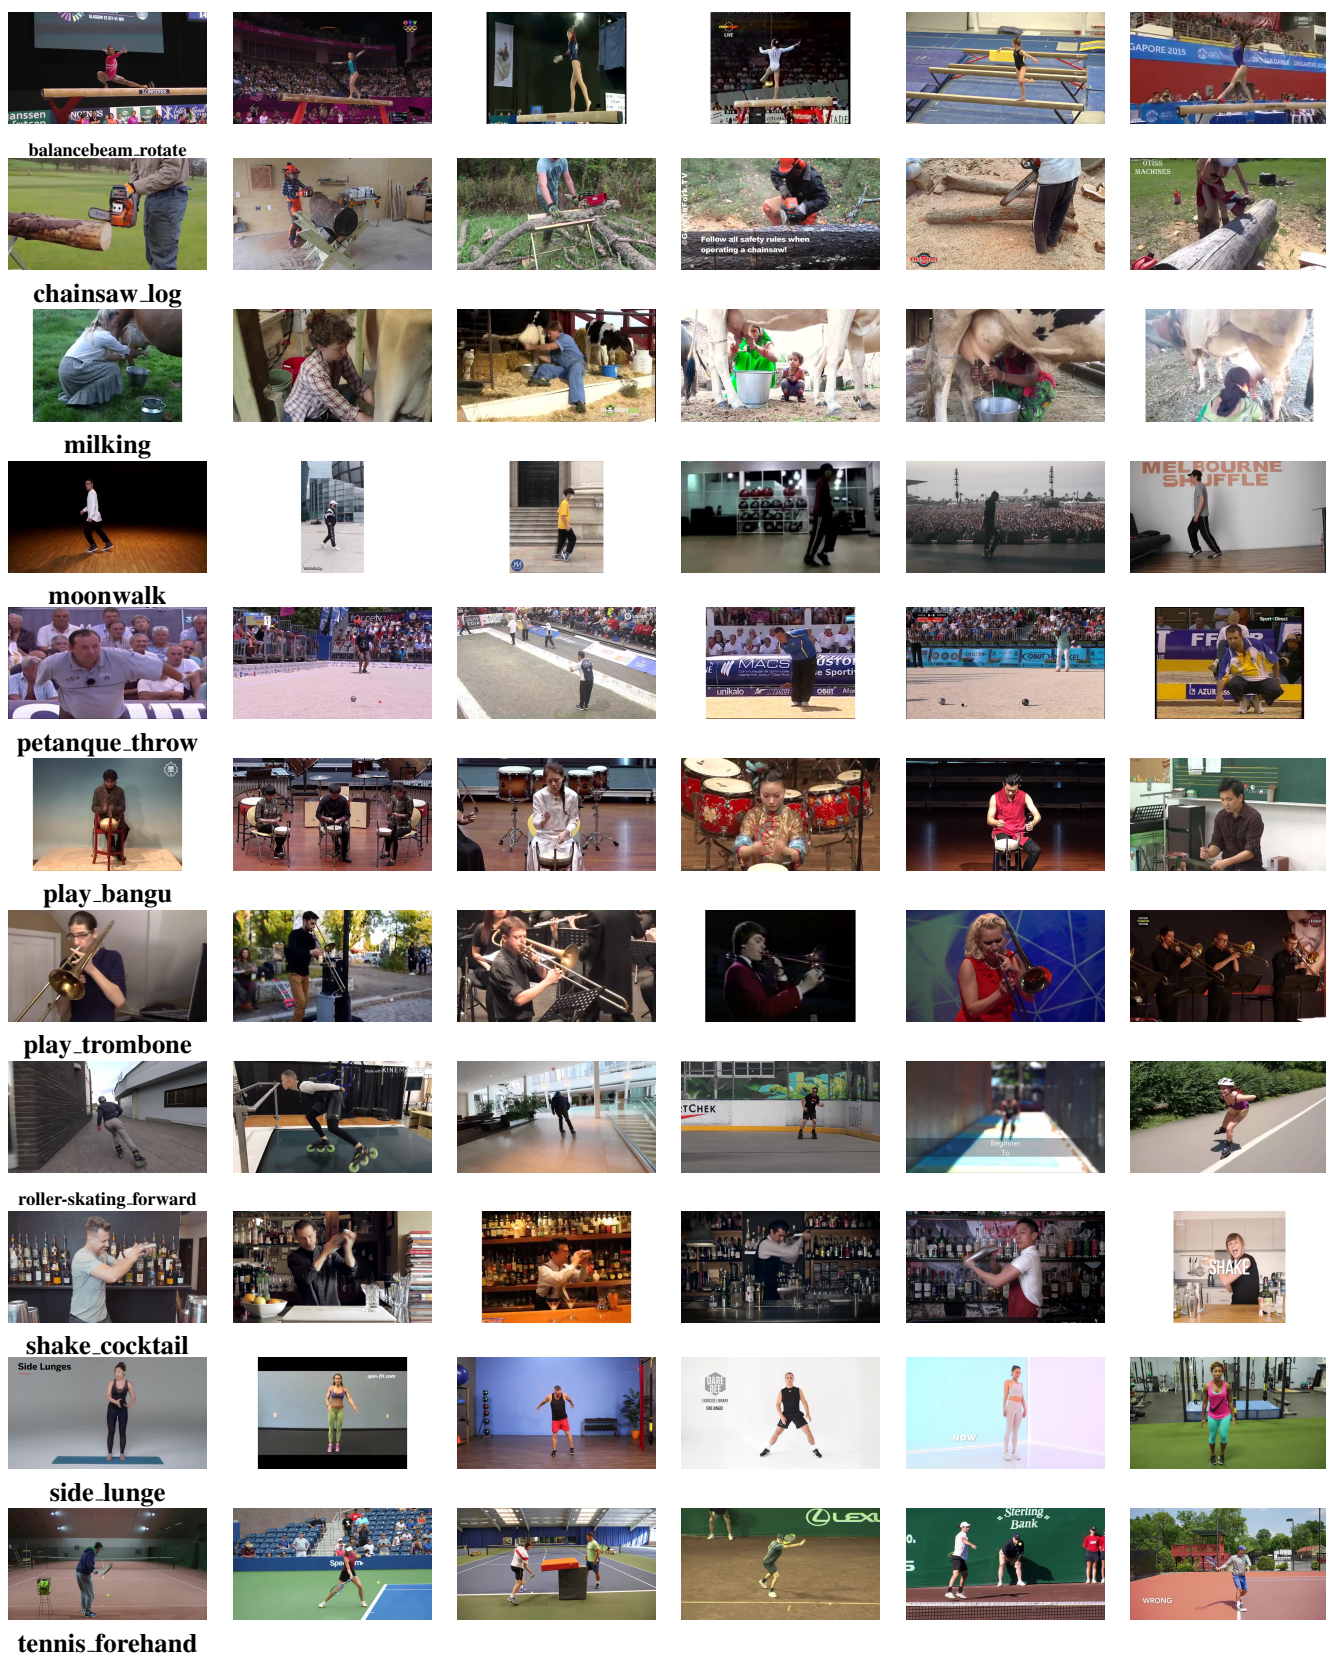

Figure 2. HAA500 contains diverse videos per action class.



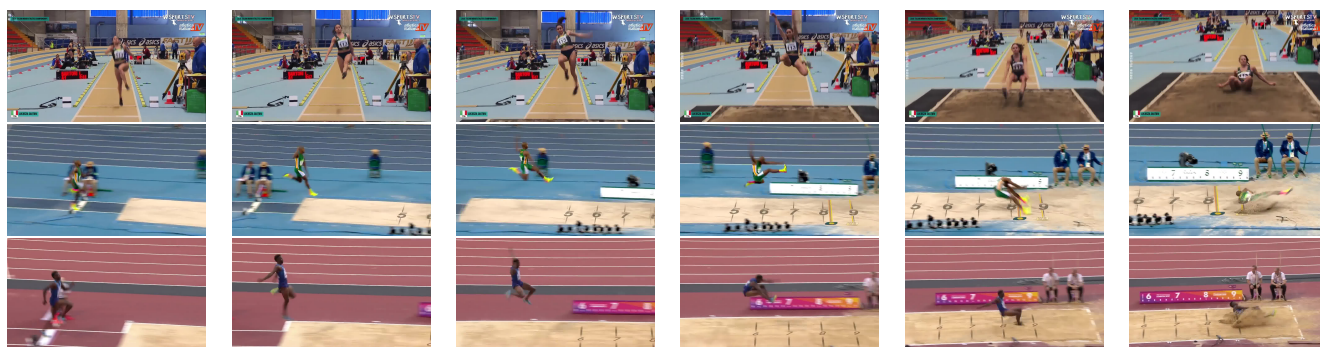

Long Jump - Jump

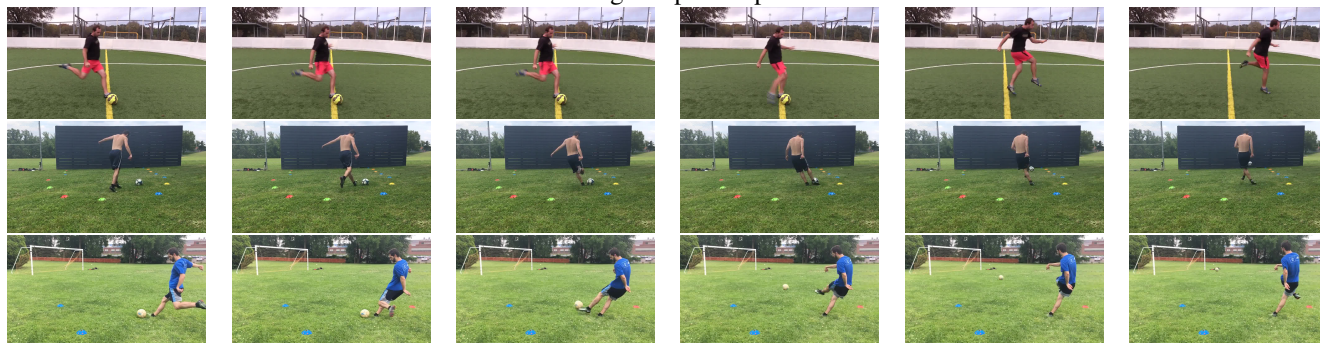

Soccer - Shoot

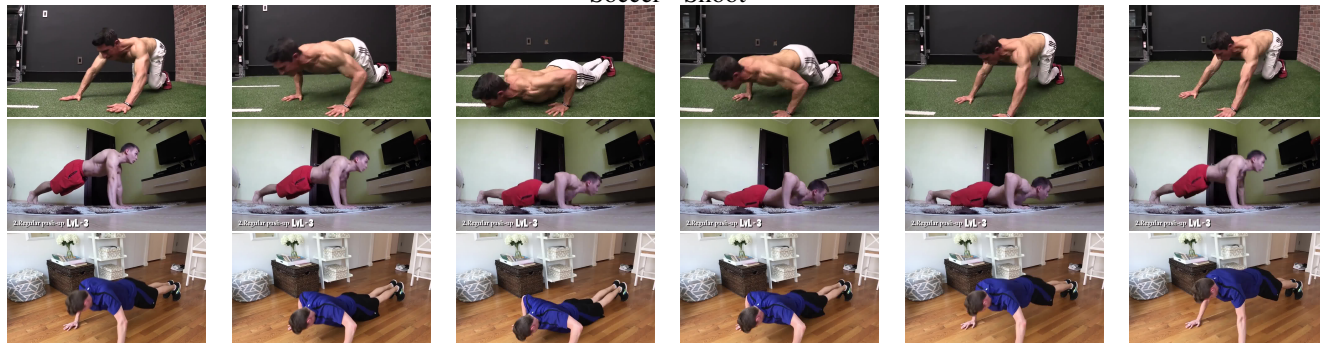

Push Up

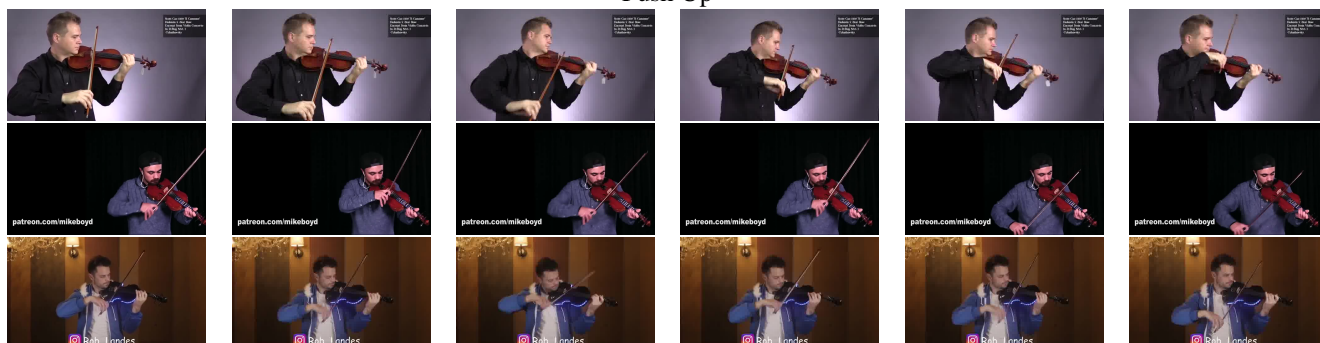

Play Violin

Figure 3. Six sample frames of different videos. Each frame has an equal distance from the other, the first and the last sample frame are the first and the last frame of the video. In discrete action classes, (*Long Jump - Jump*, *Push Up*, *Soccer - Shoot*), every video in the class shows a single motion. For action classes where it is hard to define a single motion (*i.e.*, continuous actions, *e.g.*, *Play Violin*), videos are cut in appropriate length.





13. Base Jumping
14. Baseball Baseball Swing
15. Baseball Bunt
16. Baseball Pitch
17. Baseball Run
18. Basketball Dribble
19. Basketball Dunk
20. Basketball Hookshot
21. Basketball Jabstep
22. Basketball Layup
23. Basketball Pass
24. Basketball Shoot
25. Battle-Rope Jumping-Jack
26. Battle-Rope Power-Slam
27. Battle-Rope Rainbow
28. Battle-Rope Russian-Twist
29. Battle-Rope Sideplank
30. Battle-Rope Snake
31. Battle-Rope Wave
32. Bench Dip
33. Bike Fall
34. Billiard Hit
35. Bmx Jump
36. Bmx Ride
37. Bowling
38. Bowls Throw
39. Breakdancing Flare
40. Breakdancing Flip
41. Breakdancing Rotate
42. Breakdancing Support
43. Burpee
44. Canoeing Slalom
45. Canoeing Spring
46. Catch Catcher
47. Catch Flyball
48. Catch Groundball
49. Climb Pole Climb
50. Climbing Icecliff
51. Climbing Rock
52. Climbing Rope Climb
53. Cross Country Ski Slide
54. Cross Country Ski Walk
55. Crossbow Shoot
56. Curling Follow
57. Curling Push
58. Curling Sweep
59. Dart Throw
60. Dips
61. Discus Throw
62. Diving Jump
63. Diving Rotate
64. Diving Sneak
65. Equestrian Dressage
66. Equestrian Jump
67. Equestrian Run
68. Figure Skate I Spin
69. Figure Skate Backward
70. Figure Skate Bielman Spin
71. Figure Skate Camel Spin
72. Figure Skate Donut Spin
73. Figure Skate Forward
74. Figure Skate Hydroblading
75. Figure Skate Inabauer
76. Figure Skate Jump Spin
77. Figure Skate Scratch Spin
78. Figure Skate Sit Spin
79. Floor Rotate
80. Floor Spin
81. Football Catch
82. Football Run
83. Football Throw
84. Forward Fold
85. Forward Jump
86. Forward Roll
87. Frisbee Catch
88. Frisbee Throw
89. Golf Part
90. Golf Swing
91. Grass Skiing
92. Gym Lift
93. Gym Lunges
94. Gym Plank
95. Gym Pull
96. Gym Push
97. Gym Ride
98. Gym Run
99. Gym Squat
100. Hammer Throw
101. Headstand
102. High Jump Jump
103. High Jump Run
104. High Knees
105. Horizontal Bar Flip
106. Horizontal Bar Jump
107. Horizontal Bar Land
108. Horizontal Bar Spin
109. Hula Hoop
110. Hurdle Jump
111. Javelin Run
112. Javelin Throw
113. Jetski
114. Jump Rope Jump
115. Jumping Jack Jump
116. Kayaking
117. Leg Hold Back
118. Leg Hold Flip
119. Leg Hold Front
120. Long Jump Jump
121. Long Jump Run
122. Luge
123. Paragliding
124. Petanque Throw
125. Pole Vault Jump
126. Pole Vault Run
127. Pull Ups
128. Punching Sandbag
129. Punching Speed Bag
130. Push Up
131. Quadruped Hip-Extension
132. Racewalk Walk
133. Ride Bike
134. Ride Horse
135. Ride Motorcycle
136. Ride Scooter
137. Ride Unicycle
138. Roller Skating Backward



139. Roller Skating Forward  
140. Rowing Boat  
141. Running In Place Run  
142. Scuba Diving  
143. Shotput Throw  
144. Side Lunge  
145. Sit Up  
146. Skateboard Forward  
147. Skateboard Grind  
148. Skateboard Jump  
149. Skeleton  
150. Ski Backflip  
151. Ski Cork  
152. Ski Frontflip  
153. Ski Jump Land  
154. Ski Jump Mid-Air  
155. Ski Jump Slide  
156. Skydiving  
157. Snorkeling  
158. Snowboard Jump  
159. Snowboard Slide  
160. Snowboarding Forward  
161. Soccer Dribble  
162. Soccer Header  
163. Soccer Save  
164. Soccer Shoot  
165. Soccer Throw  
166. Softball Pitch  
167. Speedskating Forward  
168. Split Leap  
169. Sprint Kneel  
170. Sprint Run  
171. Sprint Start  
172. Star Jumping Jump  
173. Surfing  
174. Swimming Backstroke  
175. Swimming Breast Stroke  
176. Swimming Butterfly Stroke  
177. Swimming Freestyle  
178. Taekwondo High Block  
179. Taekwondo Kick  
180. Taekwondo Low Block  
181. Taekwondo Middle Block  
182. Taekwondo Punch  
183. Tennis Backhand  
184. Tennis Forehand  
185. Tennis Serve  
186. Tire Pull  
187. Tire Sled  
188. Trapeze Interacting  
189. Trapeze Single  
190. Triple Jump Jump  
191. Triple Jump Run  
192. Uneven Bar Cross  
193. Uneven Bar Flip  
194. Uneven Bar Jump  
195. Uneven Bar Land  
196. Uneven Bar Spin  
197. Volleyball Overhand  
198. Volleyball Pass  
199. Volleyball Set  
200. Volleyball Underhand  
201. Water Skiing

202. Weight Lifting Hang  
203. Weight Lifting Overhead  
204. Weight Lifting Stand  
205. Windsurfing  
206. Workout Chest-Pull  
207. Workout Crunch  
208. Yoga Bridge  
209. Yoga Cat  
210. Yoga Firefly  
211. Yoga Tree  
212. Yoga Updog

### **Daily Actions**

213. Add New Car Tire  
214. Adjusting Glasses  
215. ALS Icebucket Challenge  
216. Answering Questions  
217. Applauding  
218. Applying Cream  
219. Arm Wave  
220. Bandaging  
221. Bending Back  
222. Blowdrying Hair  
223. Blowing Balloon  
224. Blowing Glass  
225. Blowing Gum  
226. Blowing Kisses  
227. Blowing Leaf  
228. Blowing Nose  
229. Bowing Fullbody  
230. Bowing Waist  
231. Brushing Floor  
232. Brushing Hair  
233. Brushing Teeth  
234. Burping  
235. Calfropes Catch  
236. Calfropes Rope  
237. Calfropes Subdue  
238. Carrying With Head  
239. Cartwheeling  
240. Cast Net  
241. Chainsaw Log  
242. Chainsaw Tree  
243. Chalkboard  
244. Chewing Gum  
245. Chopping Meat  
246. Chopping Wood  
247. Cleaning Mirror  
248. Cleaning Mopping  
249. Cleaning Sweeping  
250. Cleaning Vacuuming  
251. Cleaning Windows  
252. Clear Snow Off Car  
253. Climb Ladder  
254. Climb Stair  
255. Climbing Tree  
256. Closing Door  
257. CPR  
258. Crawling  
259. Cross Body Shoulder Stretch  
260. Cutting Onion

261. Dabbing  
262. Dog Highfive  
263. Dog Walking  
264. Drinking With Cup  
265. Drinking With Straw  
266. Eat Apple  
267. Eat Burger  
268. Eat Spagetti  
269. Eating Hotdogs  
270. Eating Ice Cream  
271. Eating Oyster  
272. Face Slapping  
273. Falling Off Chair  
274. Fire Extinguisher  
275. Fist Bump  
276. Flamethrower  
277. Folding Blanket  
278. Folding Clothes  
279. Gas Pumping To Car  
280. Guitar Smashing  
281. Hailing Taxi  
282. Haircut Scissor  
283. Hammering Nail  
284. Hand In Hand  
285. Hand-Drill Firemaking Blow  
286. Hand-Drill Firemaking Drill With Bow  
287. Hand-Drill Firemaking Drill With Hand  
288. Handsaw  
289. Handshake Dog  
290. Hanging Clothes  
291. Headbang  
292. Heimlich Maneuver  
293. High Five  
294. Hold Baby  
295. Hold Baby With Wrap  
296. Hookah  
297. Hugging Animal  
298. Hugging Human  
299. Ironing Clothes  
300. Jack Up Car  
301. Kick Open Door  
302. Kiss  
303. Leaf Blowing  
304. Milking  
305. Neck Side Pull Stretch  
306. Opening Door  
307. Pancake Flip  
308. Peeling Banana  
309. Pizza Dough Toss  
310. Plunging Toilet  
311. Pottery Wheel  
312. Pouring Wine  
313. Push Car  
314. Push Wheelchair  
315. Push Wheelchair Alone  
316. Putting Scarf On  
317. Read Newspaper  
318. Reading Book  
319. Remove Car Tire  
320. Rescue Breathing  
321. Riding Camel  
322. Riding Elephant  
323. Riding Mechanical Bull

324. Riding Mule  
325. Riding Ostrich  
326. Riding Zebra  
327. Rolling Snow  
328. Salute  
329. Screw Car Tire  
330. Setup Tent  
331. Shake Cocktail  
332. Shaking Head  
333. Shaving Beard  
334. Shoe Shining  
335. Shoveling Snow  
336. Sledgehammer Strike Down  
337. Smoking Exhale  
338. Smoking Inhale  
339. Spitting On Face  
340. Spraying Wall  
341. Sticking Tongue Out  
342. Stomping Grapes  
343. Styling Hair  
344. Swinging Axe On A Tree  
345. Talking Megaphone  
346. Talking On Phone  
347. Throwing Bouquet  
348. Using Inhaler  
349. Using Lawn Mower  
350. Using Lawn Mower Riding Type  
351. Using Metal Detector  
352. Using Scythe  
353. Using Spinning Wheel  
354. Using String Trimmer  
355. Using Typewriter  
356. Walking With Crutches  
357. Walking With Walker  
358. Wall Paint Brush  
359. Wall Paint Roller  
360. Washing Clothes  
361. Washing Dishes  
362. Watering Plants  
363. Wear Face Mask  
364. Wear Helmet  
365. Whipping  
366. Writing On Blackboard  
367. Yawning

### **Musical Instruments**

368. Accordion  
369. Bagpipes  
370. Bangu  
371. Banjo  
372. Bass Drum  
373. Bowsaw  
374. Cajon Drum  
375. Castanet  
376. Cello  
377. Clarinet  
378. Conga Drum  
379. Cornett  
380. Cymbals  
381. Doublebass  
382. Erhu



383. Gong
384. Grandpiano
385. Guitar
386. Handpan
387. Harp
388. Hulusi
389. Jazzdrum
390. Leaf-Flute
391. Lute
392. Maracas
393. Melodic
394. Noseflute
395. Ocarina
396. Otamatone
397. Panpipe
398. Piccolo
399. Recorder
400. Sanxian
401. Saxophone
402. Serpeng
403. Sheng
404. Sitar
405. Snare Drum
406. Sunoa
407. Taiko Drum
408. Tambourine
409. Thereminvox
410. Timpani
411. Triangle
412. Trombone
413. Trumpet
414. Ukulele
415. Viola
416. Violin
417. Xylophone
418. Yangqin
442. Fish-Hunting Hold
443. Fish-Hunting Pull
444. Flipping Bottle
445. Floss Dance
446. Flying Kite
447. Ganggangsullae
448. Gangnam Style Dance
449. Grass Skating
450. Guitar Flip
451. Hopscotch Pickup
452. Hopscotch Skip
453. Hopscotch Spin
454. Ice Scuplting
455. Juggling Balls
456. Kick Jianzi
457. Knitting
458. Marble Scuplting
459. Moonwalk
460. Piggyback Ride
461. Play Diabolo
462. Play Kendama
463. Play Yoyo
464. Playing Nunchucks
465. Playing Rubiks Cube
466. Playing Seesaw
467. Playing Swing
468. Rock Balancing
469. Rock Paper Scissors
470. Running On Four
471. Sack Race
472. Sand Scuplting
473. Segway
474. Shoot Dance
475. Shooting Handgun
476. Shooting Shotgun
477. Shuffle Dance
478. Sling
479. Slingshot
480. Snow Angel
481. Speed Stack
482. Spinning Basketball
483. Spinning Book
484. Spinning Plate
485. Stone Skipping
486. Sword Swallowing
487. Taichi Fan
488. Taking Photo Camera
489. Taking Selfie
490. Tap Dancing
491. Three Legged Race
492. Throw Boomerang
493. Throw Paper-Plane
494. Tight-Rope Walking
495. Trampoline
496. Tug Of War
497. Underarm Turn
498. Walking On Stilts
499. Whistle One Hand
500. Whistle Two Hands

### **Games and Hobbies**

419. Air Drumming
420. Air Guitar
421. Air Hockey
422. Alligator Wrestling
423. Archaeological Excavation
424. Arm Wrestling
425. Atlatl Throw
426. Axe Throwing
427. Balloon Animal
428. Beer Pong Throw
429. Belly Dancing
430. Blow Gun
431. Building Snowman
432. Card Throw
433. Conducting
434. Decorating Snowman
435. Dice Shuffle Reveal
436. Dice Stack Shuffle
437. DJ
438. Draw Handgun
439. Face-Changing Opera
440. Fire Breathing
441. Fire Dancing Circulating
442. Fish-Hunting Hold
443. Fish-Hunting Pull
444. Flipping Bottle
445. Floss Dance
446. Flying Kite
447. Ganggangsullae
448. Gangnam Style Dance
449. Grass Skating
450. Guitar Flip
451. Hopscotch Pickup
452. Hopscotch Skip
453. Hopscotch Spin
454. Ice Scuplting
455. Juggling Balls
456. Kick Jianzi
457. Knitting
458. Marble Scuplting
459. Moonwalk
460. Piggyback Ride
461. Play Diabolo
462. Play Kendama
463. Play Yoyo
464. Playing Nunchucks
465. Playing Rubiks Cube
466. Playing Seesaw
467. Playing Swing
468. Rock Balancing
469. Rock Paper Scissors
470. Running On Four
471. Sack Race
472. Sand Scuplting
473. Segway
474. Shoot Dance
475. Shooting Handgun
476. Shooting Shotgun
477. Shuffle Dance
478. Sling
479. Slingshot
480. Snow Angel
481. Speed Stack
482. Spinning Basketball
483. Spinning Book
484. Spinning Plate
485. Stone Skipping
486. Sword Swallowing
487. Taichi Fan
488. Taking Photo Camera
489. Taking Selfie
490. Tap Dancing
491. Three Legged Race
492. Throw Boomerang
493. Throw Paper-Plane
494. Tight-Rope Walking
495. Trampoline
496. Tug Of War
497. Underarm Turn
498. Walking On Stilts
499. Whistle One Hand
500. Whistle Two Hands

## 4. Composite Classes

We list how *Musical Instrument* and *Sports/Athletics* classes form to become composite actions. We list indices of the classes for each composite action.

### 4.1. Sports/Athletics

1. 49
2. 79, 80
3. 99
4. 65, 66, 67
5. 2
6. 178, 179, 180, 181, 182
7. 120, 121
8. 39, 40, 41, 42
9. 114
10. 140
11. 111, 112
12. 25, 26, 27, 28, 29, 30, 31
13. 60
14. 56, 57, 58
15. 156
16. 144
17. 59
18. 150, 151, 152
19. 168
20. 167
21. 102, 103
22. 145
23. 81, 82, 83
24. 92
25. 128, 129
26. 50, 51
27. 53, 54
28. 138, 139
29. 43
30. 174, 175, 176, 177
31. 183, 184, 185
32. 201
33. 8, 9, 10, 11, 12
34. 142
35. 149
36. 1
37. 32
38. 62, 63, 64
39. 141
40. 109
41. 104
42. 122
43. 110
44. 38
45. 100
46. 157
47. 37
48. 197, 198, 199, 200
49. 116
50. 153, 154, 155
51. 84
52. 131
53. 127
54. 18, 19, 20, 21, 22, 23, 24
55. 117, 118, 119

56. 186, 187
57. 160
58. 169, 170, 171
59. 158, 159
60. 206, 207
61. 13
62. 172
63. 133, 134, 135, 136, 137
64. 123
65. 124
66. 205
67. 5, 6, 7
68. 86
69. 208, 209, 210, 211, 212
70. 113
71. 202, 203, 204
72. 166
73. 105, 106, 107, 108
74. 192, 193, 194, 195, 196
75. 125, 126
76. 61
77. 173
78. 143
79. 85
80. 188, 189
81. 130
82. 101
83. 55
84. 68, 69, 70, 71, 72, 73, 74, 75, 76, 77, 78
85. 52
86. 115
87. 91
88. 146, 147, 148
89. 87, 88
90. 44, 45
91. 89, 90
92. 3
93. 190, 191
94. 4
95. 35, 36
96. 34
97. 33
98. 14, 15, 16, 17, 46, 47, 48
99. 93, 94, 95, 96, 97, 98
100. 132
101. 161, 162, 163, 164, 165

### 4.2. Musical Instruments

1. 369, 377, 379, 388, 390, 394, 395, 397, 398, 401, 402, 403, 406, 412, 413, 399
2. 371, 373, 376, 381, 382, 385, 387, 391, 396, 400, 404, 409, 414, 415, 416
3. 370, 372, 374, 375, 378, 380, 383, 386, 389, 392, 405, 407, 408, 410, 411, 417, 418
4. 368, 384, 393



## 5. HAA-COCO

Here we list the classes in HAA-COCO.

- 1, 4, 5, 6, 7, 8, 9, 10, 11, 13, 14, 15, 16, 17, 18, 19, 20, 21, 22, 23, 32, 33, 34, 35, 36, 37, 45, 46, 47, 58, 60, 80, 81, 82, 86, 87, 88, 89, 99, 108, 110, 111, 115, 124, 125, 127, 128, 132, 133, 134, 135, 136, 139, 142, 160, 161, 162, 163, 164, 165, 182, 183, 184, 196, 197, 198, 199, 201, 202, 203, 212, 214, 235, 236, 237, 245, 246, 248, 249, 250, 251, 252, 263, 264, 265, 266, 267, 268, 276, 277, 278, 289, 298, 299, 305, 307, 311, 312, 313, 314, 316, 317, 318, 321, 325, 328, 330, 336, 337, 339, 345, 357, 358, 359, 360, 361, 367, 375, 376, 379, 381, 383, 384, 386, 388, 398, 400, 409, 410, 411, 412, 413, 414, 415, 427, 431, 434, 435, 443, 454, 480, 481, 487, 488

## 6. Sample Videos

Figure 1 shows the first frame of a video in different classes. Figure 2 lists diverse videos per class.

## 7. Hierarchy

Figure 4 shows the hierarchy of action classes in *Sports/Athletics* area where the actions are grouped together with other actions in the same sports category.

## References

- [1] João Carreira and Andrew Zisserman. Quo vadis, action recognition? A new model and the kinetics dataset. In *CVPR 2017*. 1
- [2] Christoph Feichtenhofer, Haoqi Fan, Jitendra Malik, and Kaiming He. Slowfast networks for video recognition. In *CVPR 2019*. 1
- [3] Limin Wang, Yuanjun Xiong, Zhe Wang, Yu Qiao, Dahua Lin, Xiaoou Tang, and Luc Van Gool. Temporal segment networks for action recognition in videos. *TPAMI 2018*. 1
- [4] Sijie Yan, Yuanjun Xiong, and Dahua Lin. Spatial temporal graph convolutional networks for skeleton-based action recognition. In *AAAI 2018*. 1
- [5] Ceyuan Yang, Yinghao Xu, Jianping Shi, Bo Dai, and Bolei Zhou. Temporal pyramid network for action recognition. In *CVPR 2020*. 1
